# Supplementary material for: Prevalence and genotyping of Trichomonas infections in wild birds in central Germany
Source: PubMed Central journal article supplement (PMC6084888; doi:10.1371/journal.pone.0200798), 2018-08-09
Supplement: pone.0200798.s001.pdf [file pone.0200798.s001.pdf]

## Prevalence and genotyping of *Trichomonas* infections in wild birds in central Germany

Petra Quillfeldt, Yvonne R. Schumm, Carina Marek, Viktoria Mader, Dominik Fischer and Melanie Marx

### Supplementary material

**S1 Table:** *Trichomonas* samples (N=71) with their closest GenBank match for ITS1/5.8S/ITS2 region, maximum identity and query coverage in % as well as the *Trichomonas* species of the GenBank match, lineage of *Trichomonas gallinae*, host and country in which the reference was found.

| Order+<br>Host species | Sample ID | <i>Trichomonas</i> species | Lineage | Accession number | Identity   | Query cover | Host species       | country |
|------------------------|-----------|----------------------------|---------|------------------|------------|-------------|--------------------|---------|
| <b>Accipitriformes</b> |           |                            |         |                  |            |             |                    |         |
| Common buzzard         | T15-013   | <i>T. gallinae</i>         | C/V/N   | KX459475         | 100%       | 99%         | Woodpigeon         | Germany |
| Common buzzard         | T17-077   | <i>T. gallinae</i>         | A/B     | KX844991         | 100%       | 100%        | Collared dove      | Malta   |
| Honey buzzard          | T15-002   | <i>T. gallinae</i>         | O       | KX459498         | <b>98%</b> | 99%         | Turtle dove        | Spain   |
| Northern<br>Goshawk    | T15-034   | <i>T. gallinae</i>         | C/V/N   | KX459497         | 100%       | 99%         | Turtle dove        | Spain   |
| Northern<br>Goshawk    | T16-154   | <i>T. gallinae</i>         | C/V/N   | KX459474         | 100%       | 100%        | Woodpigeon         | Germany |
| Northern<br>Goshawk    | T17-089   | <i>T. gallinae</i>         | C/V/N   | KX459476         | 100%       | 100%        | Woodpigeon         | Germany |
| Red kite               | T15-011   | <i>T. vaginalis</i>        | -       | KP987798         | <b>97%</b> | 99%         | unknown            | Turkey  |
| Red kite               | T15-035   | <i>T. vaginalis</i>        | -       | KP987798         | <b>97%</b> | 99%         | unknown            | Turkey  |
| Red kite               | T16-068   | <i>T. gallinae</i>         | A/B     | KX844991         | 100%       | 100%        | Collared dove      | Malta   |
| Sparrowhawk            | T15-007   | <i>T. gallinae</i>         | A/B     | KC215387         | <b>99%</b> | 97%         | Band-tailed pigeon | USA     |
| Sparrowhawk            | T17-066   | <i>T. gallinae</i>         | A/B     | KC215387         | 100%       | 100%        | Band-tailed pigeon | USA     |

| Order+<br>Host species | Sample ID | <i>Trichomonas species</i> | Lineage | Accession number | Identity   | Query cover | Host species       | country |
|------------------------|-----------|----------------------------|---------|------------------|------------|-------------|--------------------|---------|
| <b>Anseriformes</b>    |           |                            |         |                  |            |             |                    |         |
| Egyptian goose         | T17-079   | <i>T. gallinae</i>         | C/V/N   | KX459498         | 100%       | 100%        | Turtle dove        | Spain   |
| <b>Columbiformes</b>   |           |                            |         |                  |            |             |                    |         |
| Collared dove          | T15-032   | <i>T. gallinae</i>         | C/V/N   | KX459497         | 100%       | 99%         | Turtle dove        | Spain   |
| Feral Pigeon           | T15-005   | <i>T. gallinae</i>         | C/V/N   | KX459485         | <b>99%</b> | 99%         | Turtle dove        | Spain   |
| Feral Pigeon           | T15-025   | <i>T. gallinae</i>         | A/B     | KX459444         | 100%       | 99%         | Stock dove         | Germany |
| Feral Pigeon           | T15-038   | <i>T. gallinae</i>         | C/V/N   | KX459498         | <b>99%</b> | 100%        | Turtle dove        | Spain   |
| Feral Pigeon           | T16-003   | <i>T. gallinae</i>         | C/V/N   | KX459505         | 100%       | 100%        | Turtle dove        | Italy   |
| Feral Pigeon           | T16-005   | <i>T. gallinae</i>         | C/V/N   | KX459498         | 100%       | 100%        | Turtle dove        | Spain   |
| Feral Pigeon           | T16-029   | <i>T. gallinae</i>         | C/V/N   | KX459505         | 100%       | 100%        | Turtle dove        | Italy   |
| Feral Pigeon           | T16-069   | <i>T. gallinae</i>         | C/V/N   | KX459505         | 100%       | 100%        | Turtle dove        | Italy   |
| Feral Pigeon           | T17-016   | <i>T. gallinae</i>         | A/B     | KX459474         | <b>99%</b> | 100%        | Woodpigeon         | Germany |
| Feral Pigeon           | T17-070   | <i>T. gallinae</i>         | C/V/N   | KX459475         | 100%       | 100%        | Woodpigeon         | Germany |
| Feral Pigeon           | T17-138   | <i>T. gallinae</i>         | C/V/N   | KX459498         | 100%       | 100%        | Turtle dove        | Spain   |
| Feral Pigeon           | T17-156   | <i>T. gallinae</i>         | A/B     | KX844991         | 100%       | 100%        | Collared dove      | Malta   |
| Feral Pigeon           | T17-160   | <i>T. gallinae</i>         | A/B     | KC215387         | 100%       | 99%         | Band-tailed pigeon | USA     |
| Feral Pigeon           | T17-162   | <i>T. gallinae</i>         | A/B     | KX844991         | 100%       | 100%        | Collared dove      | Malta   |
| Feral Pigeon           | T17-167   | <i>T. gallinae</i>         | C/V/N   | KX459475         | 100%       | 100%        | Woodpigeon         | Germany |
| Feral Pigeon           | T17-169   | <i>T. gallinae</i>         | C/V/N   | KX459499         | 100%       | 100%        | Turtle dove        | Spain   |
| Stock dove             | T17-124   | <i>T. gallinae</i>         | A/B     | KX844991         | 100%       | 100%        | Collared dove      | Malta   |
| Woodpigeon             | T15-014   | <i>T. gallinae</i>         | C/V/N   | KX459498         | 100%       | 100%        | Turtle dove        | Spain   |
| Woodpigeon             | T15-026   | <i>T. gallinae</i>         | C/V/N   | KX459505         | 100%       | 99%         | Turtle dove        | Italy   |
| Woodpigeon             | T15-033   | <i>T. gallinae</i>         | C/V/N   | KX459498         | 100%       | 99%         | Turtle dove        | Spain   |
| Woodpigeon             | T15-040   | <i>T. gallinae</i>         | C/V/N   | KX459498         | 100%       | 100%        | Turtle dove        | Spain   |
| Woodpigeon             | T15-104   | <i>T. gallinae</i>         | C/V/N   | KX459474         | <b>99%</b> | 100%        | Woodpigeon         | Germany |
| Woodpigeon             | T16-040   | <i>T. gallinae</i>         | C/V/N   | KX459505         | 100%       | 100%        | Turtle dove        | Italy   |

| Order+<br>Host species | Sample ID | <i>Trichomonas species</i> | Lineage | Accession number | Identity   | Query cover | Host species       | country  |
|------------------------|-----------|----------------------------|---------|------------------|------------|-------------|--------------------|----------|
| Woodpigeon             | T16-055   | <i>T. gallinae</i>         | C/V/N   | KX459505         | 100%       | 100%        | Turtle dove        | Italy    |
| Woodpigeon             | T16-062   | <i>T. gallinae</i>         | A/B     | KX844991         | <b>99%</b> | 100%        | Collared dove      | Malta    |
| Woodpigeon             | T16-163   | <i>T. gallinae</i>         | A/B     | KX844991         | 100%       | 100%        | Collared dove      | Malta    |
| Woodpigeon             | T17-003   | <i>T. gallinae</i>         | C/V/N   | KX459498         | 100%       | 100%        | Turtle dove        | Spain    |
| Woodpigeon             | T17-025   | <i>T. gallinae</i>         | C/V/N   | KX459475         | 100%       | 100%        | Woodpigeon         | Germany  |
| Woodpigeon             | T17-073   | <i>T. gallinae</i>         | C/V/N   | KX459475         | 100%       | 100%        | Woodpigeon         | Germany  |
| Woodpigeon             | T17-082   | <i>T. gallinae</i>         | C/V/N   | KX459475         | 100%       | 100%        | Woodpigeon         | Germany  |
| Woodpigeon             | T17-090   | <i>T. gallinae</i>         | A/B     | KX844991         | 100%       | 100%        | Collared dove      | Malta    |
| Woodpigeon             | T17-108   | <i>T. gallinae</i>         | C/V/N   | KX459498         | 100%       | 100%        | Turtle dove        | Spain    |
| Woodpigeon             | T17-112   | <i>T. gallinae</i>         | C/V/N   | KX459498         | 100%       | 100%        | Turtle dove        | Spain    |
| Woodpigeon             | T17-154   | <i>T. gallinae</i>         | C/V/N   | KX459499         | 100%       | 100%        | Turtle dove        | Spain    |
| <b>Falconiformes</b>   |           |                            |         |                  |            |             |                    |          |
| Common kestrel         | T15-015   | <i>T. gallinae</i>         | C/V/N   | KX459475         | <b>99%</b> | 98%         | Woodpigeon         | Germany  |
| Common kestrel         | T16-057   | <i>T. gallinae</i>         | A/B     | KX844991         | 100%       | 100%        | Collared dove      | Malta    |
| Common kestrel         | T16-076   | <i>T. gallinae</i>         | II      | KX844984         | 100%       | 100%        | Turtle dove        | Malta    |
| Common kestrel         | T17-088   | <i>T. gallinae</i>         | C/V/N   | KX459498         | 100%       | 100%        | Turtle dove        | Spain    |
| Peregrine falcon       | T17-013   | <i>T. gallinae</i>         | A/B     | KX584000         | 100%       | 100%        | Canary             | Slovenia |
| <b>Passeriformes</b>   |           |                            |         |                  |            |             |                    |          |
| Blackbird              | T15-053   | <i>T. gallinae</i>         | C/V/N   | KX459475         | <b>99%</b> | 99%         | Woodpigeon         | Germany  |
| Blackbird              | T15-055   | <i>T. gallinae</i>         | C/V/N   | KX459475         | 100%       | 99%         | Woodpigeon         | Germany  |
| Blackbird              | T15-066   | <i>T. gallinae</i>         | A/B     | KC215387         | 100%       | 99%         | Band-tailed pigeon | USA      |
| Blackbird              | T15-077   | <i>T. gallinae</i>         | A/B     | KC215387         | <b>99%</b> | 99%         | Band-tailed pigeon | USA      |
| Blackbird              | T15-078   | <i>T. gallinae</i>         | C/V/N   | KX459474         | 100%       | 100%        | Woodpigeon         | Germany  |
| Blackbird              | T15-081   | <i>T. tenax</i>            | -       | KX459453         | <b>98%</b> | 99%         | Stock dove         | Germany  |
| Chaffinch              | T14-BF2   | <i>T. tenax</i>            | -       | KX459511         | 100%       | 100%        | Turtle dove        | Italy    |

| Order+<br>Host species | Sample ID | <i>Trichomonas species</i> | Lineage | Accession number | Identity   | Query cover | Host species       | country  |
|------------------------|-----------|----------------------------|---------|------------------|------------|-------------|--------------------|----------|
| Chaffinch              | T15-086   | <i>T. gallinae</i>         | -       | KC215387         | <b>99%</b> | 99%         | Band-tailed pigeon | USA      |
| Chaffinch              | T17-157   | <i>T. gallinae</i>         | A/B     | KX844991         | 100%       | 100%        | Collared dove      | Malta    |
| European Robin         | T15-064   | <i>T. gallinae</i>         | C/V/N   | KX459498         | 100%       | 100%        | Turtle dove        | Spain    |
| Greenfinch             | T14-GF1   | <i>T. gallinae</i>         | A/B     | KX584000         | 100%       | 97%         | Canary             | Slovenia |
| Greenfinch             | T17-091   | <i>T. gallinae</i>         | A/B     | KC215387         | 100%       | 99%         | Band-tailed pigeon | USA      |
| <b>Strigiformes</b>    |           |                            |         |                  |            |             |                    |          |
| Barn owl               | T15-019   | <i>T. gallinae</i>         | C/V/N   | KX459498         | <b>99%</b> | 99%         | Turtle dove        | Spain    |
| Barn owl               | T15-102   | <i>T. gallinae</i>         | C/V/N   | KX459498         | 100%       | 99%         | Turtle dove        | Spain    |
| Eagle Owl              | T15-006   | <i>T. gallinae</i>         | C/V/N   | KX459474         | 100%       | 100%        | Woodpigeon         | Germany  |
| Eagle Owl              | T15-041   | <i>T. gallinae</i>         | C/V/N   | KX459474         | <b>99%</b> | 100%        | Woodpigeon         | Germany  |
| Eagle Owl              | T16-075   | <i>T. gallinae</i>         | II      | KX844987         | <b>99%</b> | 100%        | Turtle dove        | Malta    |
| Long-eared owl         | T15-028   | <i>T. gallinae</i>         | C/V/N   | KX459475         | <b>99%</b> | 99%         | Woodpigeon         | Germany  |
| Tawny Owl              | T15-017   | <i>T. gallinae</i>         | C/V/N   | KX459475         | 100%       | 100%        | Woodpigeon         | Germany  |
| Tawny Owl              | T15-024   | <i>T. gallinae</i>         | C/V/N   | KX459474         | 100%       | 100%        | Woodpigeon         | Germany  |
