# Supplementary material for: Prevalence and genotyping of Trichomonas infections in wild birds in central Germany
Source: PubMed Central journal article supplement (PMC6084888; doi:10.1371/journal.pone.0200798), 2018-08-09

# Prevalence and genotyping of *Trichomonas* infections in wild birds in central Germany

Petra Quillfeldt, Yvonne R. Schumm, Carina Marek, Viktoria Mader, Dominik Fischer and Melanie Marx

## Supplementary material

**S1 Fig.** Decline in greenfinch numbers in Hesse, Germany, according to the summer (<https://www.nabu.de/tiere-und-pflanzen/aktionen-und-projekte/stunde-der-gartenvoegel/index.html>) and winter garden bird counts (<https://www.nabu.de/tiere-und-pflanzen/aktionen-und-projekte/stunde-der-wintervoegel/index.html>) of the NABU (Nature and Biodiversity Conservation Union, Germany). Counts are carried out as citizen science projects in May and January, respectively.

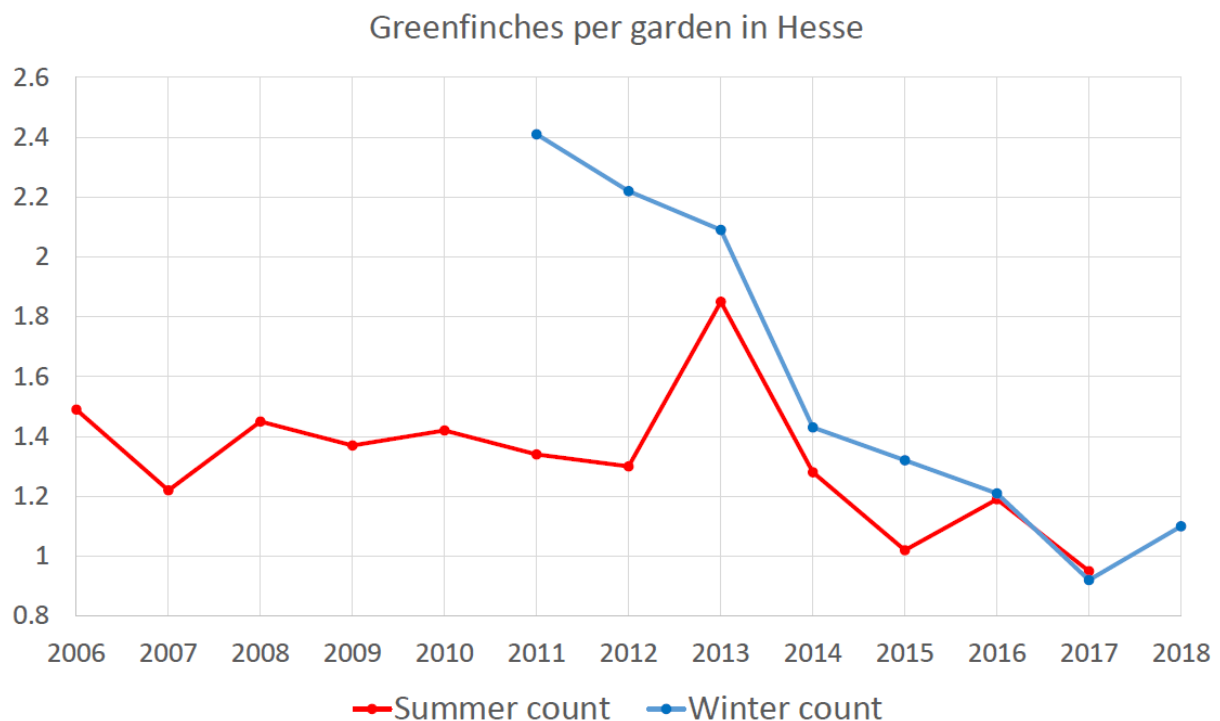

Supplement: pone.0200798.s002.pdf [file pone.0200798.s002.pdf]
